# Supplementary material
Source: PubMed Central journal article supplement (PMC6712531)
Supplement: baADV2019000025-suppl1.pdf [file baADV2019000025-suppl1.pdf]

## Supplemental data

**Suppl. Table 1.** Reasons for hospitalization and onset of adverse events after end of blinatumomab treatment.

| Patient ID | Adverse event           | Time to onset after end of blinatumomab treatment (d) |
|------------|-------------------------|-------------------------------------------------------|
| 41         | Infectious diarrhea     | 42                                                    |
| 42         | Port infection          | 30                                                    |
|            | Atrial fibrillation     | 30                                                    |
|            | Cardiac decompensation  | 34                                                    |
| 44         | Pancreatitis            | 14                                                    |
| 62         | Fever of unknown origin | 10                                                    |
| 66         | Sepsis                  | 122                                                   |
| 69         | NSTEMI                  | 5                                                     |
|            | Aortic valve stenosis   | 1367                                                  |
|            | Dyspnea                 | 1398                                                  |
|            | Cardiac insufficiency   | 1581                                                  |
|            | Pneumonia               | 1704                                                  |
| 70         | Infectious diarrhea     | 1224                                                  |
| 72         | Preileus                | 2967                                                  |
|            | Cholecystitis           | 3151                                                  |
| 74         | Pneumonia               | 66                                                    |
|            | Dyspnea                 | 687                                                   |
| 76         | Port infection          | 345                                                   |

**Suppl. Table 2.** Characteristics of patients evaluated by MoCA testing (n=9).

Scores on the MoCA range from zero to 30, with a score of 26 and higher generally being considered as normal. \*Patient presented with slight impairment of visospatial cognition considered to be age-related rather than related to blinatumomab. AE, adverse event

| <b>Patient ID</b>                                               | <b>66</b> | <b>67</b> | <b>68</b> | <b>70</b> | <b>72</b> | <b>73</b> | <b>74</b> | <b>75</b> | <b>76</b> |
|-----------------------------------------------------------------|-----------|-----------|-----------|-----------|-----------|-----------|-----------|-----------|-----------|
| <b>Sex (m/f)</b>                                                | m         | m         | f         | m         | m         | m         | m         | f         | m         |
| <b>Age (y)</b>                                                  | 43        | 42        | 52        | 62        | 70        | 68        | 58        | 64        | 66        |
| <b>Prior systemic therapies (n)</b>                             | 3         | 2         | 3         | 3         | 1         | 3         | 1         | 3         | 1         |
| <b>Duration of blinatumomab treatment (d)</b>                   | 57        | 58        | 15        | 57        | 35        | 57        | 57        | 56        | 57        |
| <b>Max. dose (<math>\mu\text{g}/\text{m}^2/\text{d}</math>)</b> | 60        | 60        | 60        | 60        | 60        | 90        | 60        | 60        | 60        |
| <b>Neurological AE during treatment</b>                         | X         |           |           |           |           | X         | X         |           | X         |
| <b>Responder (CR or PR)</b>                                     | X         | X         |           | X         | X         | X         | X         | X         | X         |
| <b>MoCA-Score</b>                                               | 28        | 28        | 30        | 26        | 21*       | 26        | 30        | 30        | 26        |

Suppl. Figure 1

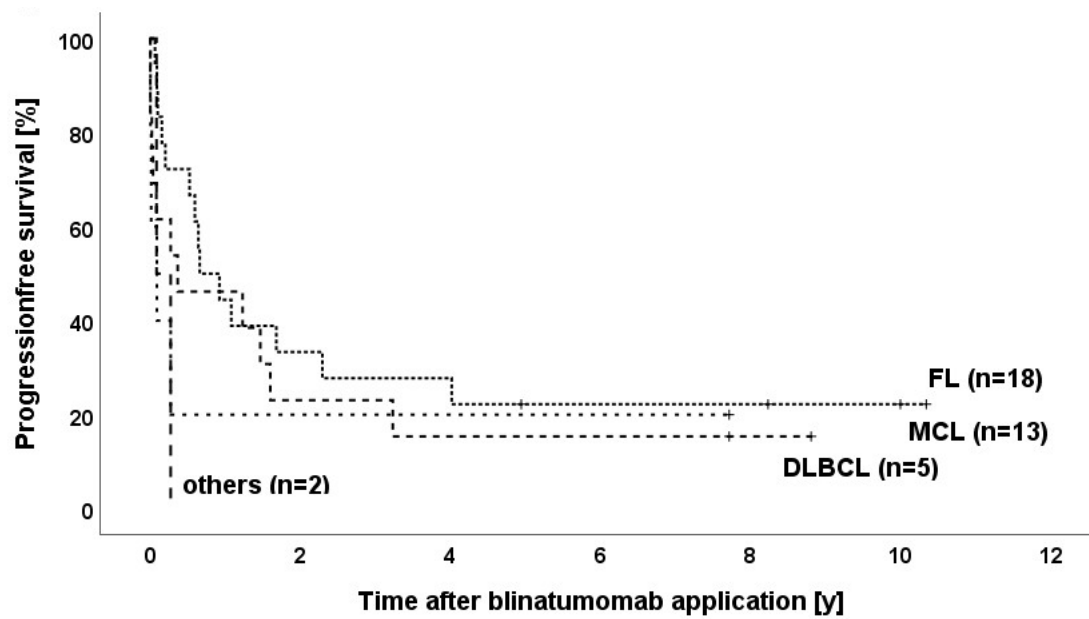

Legend to Suppl. Figure 1

**Kaplan-Meier estimates for PFS with combined analysis of patients with relapsed or refractory FL, MCL or DLBCL as differentiated by histology who received blinatumomab.** Abbreviations: FL, follicular lymphoma; MCL, mantle cell lymphoma; DLBCL, diffuse large B cell lymphoma; y, years.
